# Supplementary material for: miRNA-like secondary structures in maize (Zea mays) genes and transposable elements correlate with small RNAs, methylation, and expression
Source: Genome Res. 2023 Nov;33(11):1932–46. doi: 10.1101/gr.277459.122 (PMC10760457; doi:10.1101/gr.277459.122)
Supplement: Supplement 4 [file Supplemental_Table_S1.xlsx]

## Sheet: Sheet1
Table S1. Small RNA libraries used
Accession #	Reference	Used in RNAfold analysis	Used in LinearPartition analysis	Notes
GSM1342517	Diez et al., 2014	X	X	3rd and 4th leaves
SRR032087	Zhang et al., 2009		X	Ear
SRR032088	Zhang et al., 2009		X	Ear
SRR032089	Zhang et al., 2009		X	Ear
SRR032090	Zhang et al., 2009		X	Ear
SRR032091	Zhang et al., 2009	X	X	Ear
SRR1186264	Diez et al., 2014	X	X	3rd and 4th leaves
SRR1917157	Petsch et al., 2015	X	X	Embryo
SRR1917158	Petsch et al., 2015	X	X	Embryo
SRR2086100	Lunardon et al., 2016	X	X	Leaf and shoot apical meristem
SRR2086104	Lunardon et al., 2016	X	X	Leaf and shoot apical meristem
SRR2086116	Lunardon et al., 2016	X	X	Leaf and shoot apical meristem
SRR2086120	Lunardon et al., 2016	X	X	Leaf and shoot apical meristem
SRR2086132	Lunardon et al., 2016	X	X	Leaf and shoot apical meristem
SRR2086136	Lunardon et al., 2016	X	X	Leaf and shoot apical meristem
SRR2106180	Lunardon et al., 2016	X	X	Leaf and shoot apical meristem
SRR2106184	Lunardon et al., 2016	X	X	Leaf and shoot apical meristem
SRR2106196	Lunardon et al., 2016	X	X	Leaf and shoot apical meristem
SRR2106200	Lunardon et al., 2016	X	X	Leaf and shoot apical meristem
SRR3684242	Huang et al., 2016	X	X	Endosperm
SRR3684389	Huang et al., 2016	X	X	Endosperm
SRR895785	Liu et al., 2014	X	X	Ear
SRX483603	Diez et al., 2014	X	X	3rd and 4th leaves
SRX708789	Gent et al., 2014		X	mop1 WT control
SRX708787	Gent et al., 2014		X	mop1 mutant
SRX708790	Gent et al., 2014		X	mop1 mutant
SRX708788	Gent et al., 2014		X	mop1 mutant
GSM1178886	Zhai et al., 2013		X	hen1 mutant
GSM913701	Barbour et al., 2012		X	rmr2 mutant
GSM913702	Barbour et al., 2012		X	rmr2 mutant (heterozygote)
GSM448853	Zhang et al., 2009		X	Ear
GSM448854	Zhang et al., 2009		X	Ear
GSM448855	Zhang et al., 2009		X	Ear
GSM448856	Zhang et al., 2009		X	Ear
GSM381738	Wang et al., 2009		X	Seedling roots
GSM381716	Wang et al., 2009		X	Seedling roots
GSM448857	Zhang et al., 2009		X	Tassel
SRX120259	Gent et al., 2013		X	Unfertilized outer ear
GSM306488	Nobuta et al., 2008		X	mop1 mutant
GSM306487	Nobuta et al., 2008		X	mop1 WT control
GSM1178887	Zhai et al., 2013		X	hen1 WT control
GSM433620	Nobuta et al., 2008		X	Leaves
GSM433621	Nobuta et al., 2008		X	Leaves
GSM433622	Nobuta et al., 2008		X	Leaves
