# Supplementary material for: miRNA-like secondary structures in maize (Zea mays) genes and transposable elements correlate with small RNAs, methylation, and expression
Source: Genome Res. 2023 Nov;33(11):1932–46. doi: 10.1101/gr.277459.122 (PMC10760457; doi:10.1101/gr.277459.122)
Supplement: Supplement 5 [file Supplemental_Table_S2.xlsx]

## Sheet: Sheet1
Table S2. Correlations between metrics of predicted secondary structure and siRNA mapping density within feature types
Feature	Structure measurement	21-nt siRNA	22-nt siRNA	24-nt siRNA
DHH	minMFE	P = 3.070e-78 R2 = 7.100e-03	P = 2.180e-117 R2 = 1.070e-02	P = 3.950e-103 R2 = 9.400e-03
	meanMFE	P = 0.000e+00 R2 = 7.970e-02	P = 0.000e+00 R2 = 6.990e-02	P = 0.000e+00 R2 = 9.520e-02
	Qnorm	P = 6.250e-101 R2 = 9.200e-03	P = 3.050e-198 R2 = 1.820e-02	P = 5.080e-68 R2 = 6.150e-03
DTA	minMFE	P = 4.770e-198 R2 = 1.490e-01	P = 8.580e-194 R2 = 1.460e-01	P = 3.610e-109 R2 = 8.420e-02
	meanMFE	P = 1.610e-150 R2 = 1.150e-01	P = 4.770e-133 R2 = 1.020e-01	P = 2.280e-48 R2 = 3.740e-02
	Qnorm	P = 5.210e-04 R2 = 2.020e-03	P = 8.510e-02 R2 = 4.980e-04	P = 3.360e-07 R2 = 4.360e-03
DTC	minMFE	P = 1.360e-12 R2 = 3.900e-02	P = 9.750e-18 R2 = 5.660e-02	P = 4.440e-28 R2 = 9.120e-02
	meanMFE	P = 6.710e-68 R2 = 2.140e-01	P = 2.940e-48 R2 = 1.550e-01	P = 1.920e-41 R2 = 1.340e-01
	Qnorm	P = 1.100e-08 R2 = 2.320e-02	P = 2.900e-02 R2 = 3.420e-03	P = 2.800e-02 R2 = 3.460e-03
DTH	minMFE	P = 2.990e-76 R2 = 6.640e-02	P = 2.740e-48 R2 = 4.200e-02	P = 1.460e-32 R2 = 2.800e-02
	meanMFE	P = 1.800e-69 R2 = 6.060e-02	P = 5.940e-33 R2 = 2.840e-02	P = 2.800e-13 R2 = 1.070e-02
	Qnorm	P = 5.610e-01 R2 = 6.430e-05	P = 6.270e-01 R2 = 4.500e-05	P = 1.850e-01 R2 = 3.340e-04
DTM	minMFE	P = 6.100e-04 R2 = 8.880e-03	P = 9.640e-01 R2 = 1.550e-06	P = 4.210e-04 R2 = 9.400e-03
	meanMFE	P = 1.220e-68 R2 = 2.080e-01	P = 1.830e-76 R2 = 2.290e-01	P = 2.080e-48 R2 = 1.500e-01
	Qnorm	P = 5.380e-65 R2 = 1.910e-01	P = 3.490e-38 R2 = 1.150e-01	P = 4.980e-39 R2 = 1.170e-01
DTT	minMFE	P = 1.480e-12 R2 = 1.040e-01	P = 3.250e-12 R2 = 1.010e-01	P = 9.380e-21 R2 = 1.740e-01
	meanMFE	P = 2.260e-05 R2 = 3.870e-02	P = 3.680e-04 R2 = 2.750e-02	P = 1.750e-09 R2 = 7.650e-02
	Qnorm	P = 2.470e-14 R2 = 6.620e-02	P = 1.430e-13 R2 = 6.240e-02	P = 1.160e-25 R2 = 1.210e-01
gene	minMFE	P = 5.560e-129 R2 = 1.480e-02	P = 4.120e-106 R2 = 1.210e-02	P = 7.050e-02 R2 = 8.350e-05
	meanMFE	P = 2.850e-124 R2 = 1.420e-02	P = 2.520e-158 R2 = 1.820e-02	P = 0.000e+00 R2 = 6.820e-02
	Qnorm	P = 0.000e+00 R2 = 1.910e-01	P = 0.000e+00 R2 = 2.400e-01	P = 0.000e+00 R2 = 1.440e-01
miRNA	minMFE	P = 2.290e-01 R2 = 1.380e-02	P = 9.360e-02 R2 = 2.650e-02	P = 4.180e-01 R2 = 6.270e-03
	meanMFE	P = 3.190e-01 R2 = 9.470e-03	P = 8.550e-02 R2 = 2.790e-02	P = 1.360e-01 R2 = 2.100e-02
	Qnorm	P = 2.050e-01 R2 = 1.050e-02	P = 4.430e-02 R2 = 2.640e-02	P = 6.540e-01 R2 = 1.330e-03
RIL	minMFE	P = 4.860e-02 R2 = 1.100e-01	P = 6.800e-02 R2 = 9.460e-02	P = 1.240e-03 R2 = 2.670e-01
	meanMFE	P = 2.780e-02 R2 = 1.340e-01	P = 2.960e-02 R2 = 1.320e-01	P = 3.180e-04 R2 = 3.210e-01
	Qnorm	P = 3.390e-02 R2 = 1.260e-01	P = 7.750e-02 R2 = 8.880e-02	P = 4.470e-03 R2 = 2.140e-01
RIT	minMFE	P = 3.090e-01 R2 = 3.820e-02	P = 2.380e-01 R2 = 5.120e-02	P = 4.010e-01 R2 = 2.620e-02
	meanMFE	P = 1.260e-01 R2 = 8.460e-02	P = 8.900e-02 R2 = 1.030e-01	P = 2.660e-01 R2 = 4.560e-02
	Qnorm	P = 3.200e-01 R2 = 3.670e-02	P = 5.350e-01 R2 = 1.440e-02	P = 1.830e-01 R2 = 6.480e-02
RLC	minMFE	P = 0.000e+00 R2 = 6.980e-02	P = 0.000e+00 R2 = 6.990e-02	P = 0.000e+00 R2 = 1.140e-01
	meanMFE	P = 0.000e+00 R2 = 7.130e-02	P = 0.000e+00 R2 = 6.270e-02	P = 0.000e+00 R2 = 9.500e-02
	Qnorm	P = 3.880e-06 R2 = 1.990e-03	P = 1.230e-04 R2 = 1.380e-03	P = 4.250e-10 R2 = 3.640e-03
RLG	minMFE	P = 0.000e+00 R2 = 7.040e-02	P = 0.000e+00 R2 = 5.370e-02	P = 0.000e+00 R2 = 1.550e-01
	meanMFE	P = 0.000e+00 R2 = 1.600e-01	P = 0.000e+00 R2 = 1.080e-01	P = 0.000e+00 R2 = 2.410e-01
	Qnorm	P = 1.370e-173 R2 = 4.860e-02	P = 2.020e-156 R2 = 4.380e-02	P = 1.610e-209 R2 = 5.850e-02
RLX	minMFE	P = 0.000e+00 R2 = 1.100e-01	P = 0.000e+00 R2 = 1.280e-01	P = 0.000e+00 R2 = 1.480e-01
	meanMFE	P = 1.050e-275 R2 = 7.480e-02	P = 1.690e-254 R2 = 6.920e-02	P = 0.000e+00 R2 = 9.460e-02
	Qnorm	P = 1.090e-70 R2 = 8.720e-02	P = 1.930e-90 R2 = 1.110e-01	P = 8.230e-71 R2 = 8.740e-02
RST	minMFE	P = 2.240e-41 R2 = 1.750e-01	P = 4.840e-30 R2 = 1.280e-01	P = 2.780e-46 R2 = 1.940e-01
	meanMFE	P = 7.040e-45 R2 = 1.890e-01	P = 1.280e-30 R2 = 1.310e-01	P = 8.970e-51 R2 = 2.120e-01
	Qnorm	P = 4.870e-50 R2 = 1.930e-01	P = 7.780e-48 R2 = 1.850e-01	P = 2.080e-47 R2 = 1.840e-01
All features	minMFE	P = 0.000e+00 R2 = 9.060e-02	P = 0.000e+00 R2 = 1.030e-01	P = 0.000e+00 R2 = 7.380e-02
	meanMFE	P = 0.000e+00 R2 = 1.660e-02	P = 0.000e+00 R2 = 8.610e-03	P = 5.010e-227 R2 = 4.310e-03
	Qnorm	P = 0.000e+00 R2 = 1.010e-01	P = 0.000e+00 R2 = 1.330e-01	P = 0.000e+00 R2 = 8.930e-02
