# Supplementary material for: miRNA-like secondary structures in maize (Zea mays) genes and transposable elements correlate with small RNAs, methylation, and expression
Source: Genome Res. 2023 Nov;33(11):1932–46. doi: 10.1101/gr.277459.122 (PMC10760457; doi:10.1101/gr.277459.122)
Supplement: Supplement 6 [file Supplemental_Table_S3.xlsx]

## Sheet: Sheet1
Table S3. Statistics from mixed-effect models comparing siRNA species mapping density between lowMFE and other regions (i.e., regions less than and greater than -40 kcal/mol) of RF-structured features (i.e., features with significantly lower minMFE than five randomizations; see Methods)
Feature	21-nt siRNA	22-nt siRNA	24-nt siRNA
RLC	Estimate = -2.400e-01 | P = 0.000e+00 | std. err. = 1.860e-03	Estimate = 1.860e-01 | P = 0.000e+00 | std. err. = 1.750e-03	Estimate = -2.190e-01 | P = 0.000e+00 | std. err. = 1.320e-03
RLG	Estimate = 1.580e-01 | P = 0.000e+00 | std. err. = 1.650e-03	Estimate = 3.000e-01 | P = 0.000e+00 | std. err. = 1.520e-03	Estimate = 2.070e-01 | P = 0.000e+00 | std. err. = 1.230e-03
RLX	Estimate = -1.780e-01 | P = 0.000e+00 | std. err. = 4.140e-03	Estimate = 5.720e-02 | P = 5.350e-47 | std. err. = 3.970e-03	Estimate = 2.670e-01 | P = 0.000e+00 | std. err. = 3.140e-03
DHH	Estimate = -2.830e-01 | P = 0.000e+00 | std. err. = 2.280e-03	Estimate = 1.230e-02 | P = 1.930e-08 | std. err. = 2.190e-03	Estimate = -7.890e-02 | P = 0.000e+00 | std. err. = 1.680e-03
DTC	Estimate = -5.640e-01 | P = 9.980e-279 | std. err. = 1.550e-02	Estimate = -3.370e-01 | P = 7.810e-101 | std. err. = 1.570e-02	Estimate = -3.630e-01 | P = 8.310e-208 | std. err. = 1.170e-02
DTA	Estimate = -6.380e-01 | P = 0.000e+00 | std. err. = 8.910e-03	Estimate = -5.760e-01 | P = 0.000e+00 | std. err. = 8.500e-03	Estimate = -4.450e-01 | P = 0.000e+00 | std. err. = 6.610e-03
DTH	Estimate = -1.270e-01 | P = 6.240e-28 | std. err. = 1.160e-02	Estimate = -2.100e-01 | P = 1.610e-75 | std. err. = 1.140e-02	Estimate = -2.630e-01 | P = 5.490e-209 | std. err. = 8.470e-03
DTM	Estimate = -9.740e-01 | P = 0.000e+00 | std. err. = 1.630e-02	Estimate = -8.830e-01 | P = 0.000e+00 | std. err. = 1.520e-02	Estimate = -7.690e-01 | P = 0.000e+00 | std. err. = 1.230e-02
DTT	Estimate = -3.180e-01 | P = 7.850e-15 | std. err. = 4.060e-02	Estimate = -4.600e-01 | P = 6.030e-31 | std. err. = 3.920e-02	Estimate = -4.430e-01 | P = 8.540e-50 | std. err. = 2.940e-02
gene	Estimate = -8.780e-01 | P = 0.000e+00 | std. err. = 5.980e-03	Estimate = -7.910e-01 | P = 0.000e+00 | std. err. = 5.800e-03	Estimate = -5.400e-01 | P = 0.000e+00 | std. err. = 4.340e-03
mRNA	Estimate = -1.080e+00 | P = 0.000e+00 | std. err. = 3.830e-03	Estimate = -1.020e+00 | P = 0.000e+00 | std. err. = 3.720e-03	Estimate = -6.840e-01 | P = 0.000e+00 | std. err. = 2.870e-03
