# Supplementary material for: miRNA-like secondary structures in maize (Zea mays) genes and transposable elements correlate with small RNAs, methylation, and expression
Source: Genome Res. 2023 Nov;33(11):1932–46. doi: 10.1101/gr.277459.122 (PMC10760457; doi:10.1101/gr.277459.122)
Supplement: Supplement 7 [file Supplemental_Table_S4.xlsx]

## Sheet: Sheet1
Table S4. Statistics from mixed-effect models comparing siRNA species mapping density between LP-hairpins and non-hairpin regions.
Feature	21-nt siRNA	22-nt siRNA	24-nt siRNA
gene	Estimate = 1.820e-01 | P = 0.000e+00 | std. err. = 1.200e-03	Estimate = 2.960e-01 | P = 0.000e+00 | std. err. = 1.220e-03	Estimate = 5.420e-01 | P = 0.000e+00 | std. err. = 1.620e-03
mRNA	Estimate = 2.560e+00 | P = 0.000e+00 | std. err. = 1.670e-02	Estimate = 1.980e+00 | P = 0.000e+00 | std. err. = 1.780e-02	Estimate = 1.760e+00 | P = 0.000e+00 | std. err. = 1.580e-02
DHH	Estimate = 1.070e+00 | P = 0.000e+00 | std. err. = 1.840e-03	Estimate = 1.230e+00 | P = 0.000e+00 | std. err. = 1.970e-03	Estimate = 1.520e+00 | P = 0.000e+00 | std. err. = 2.230e-03
DTX	Estimate = 3.650e+00 | P = 0.000e+00 | std. err. = 2.590e-03	Estimate = 3.920e+00 | P = 0.000e+00 | std. err. = 2.650e-03	Estimate = 4.660e+00 | P = 0.000e+00 | std. err. = 2.910e-03
DTT	Estimate = 2.470e+00 | P = 0.000e+00 | std. err. = 1.560e-03	Estimate = 2.830e+00 | P = 0.000e+00 | std. err. = 1.670e-03	Estimate = 3.350e+00 | P = 0.000e+00 | std. err. = 1.790e-03
DTH	Estimate = 2.940e+00 | P = 0.000e+00 | std. err. = 1.670e-03	Estimate = 3.340e+00 | P = 0.000e+00 | std. err. = 1.740e-03	Estimate = 4.220e+00 | P = 0.000e+00 | std. err. = 1.910e-03
DTA	Estimate = 2.510e+00 | P = 0.000e+00 | std. err. = 4.970e-03	Estimate = 2.730e+00 | P = 0.000e+00 | std. err. = 5.020e-03	Estimate = 4.400e+00 | P = 0.000e+00 | std. err. = 6.160e-03
DTM	Estimate = 1.150e+00 | P = 0.000e+00 | std. err. = 1.840e-02	Estimate = 1.560e+00 | P = 0.000e+00 | std. err. = 1.790e-02	Estimate = 2.060e+00 | P = 0.000e+00 | std. err. = 2.020e-02
DTC	Estimate = 1.640e+00 | P = 0.000e+00 | std. err. = 8.270e-03	Estimate = 1.860e+00 | P = 0.000e+00 | std. err. = 8.750e-03	Estimate = 2.640e+00 | P = 0.000e+00 | std. err. = 1.010e-02
RLC	Estimate = 6.910e-01 | P = 0.000e+00 | std. err. = 2.840e-03	Estimate = 8.010e-01 | P = 0.000e+00 | std. err. = 3.110e-03	Estimate = 7.980e-01 | P = 0.000e+00 | std. err. = 3.290e-03
RLG	Estimate = 1.310e+00 | P = 0.000e+00 | std. err. = 1.940e-03	Estimate = 1.410e+00 | P = 0.000e+00 | std. err. = 2.150e-03	Estimate = 1.510e+00 | P = 0.000e+00 | std. err. = 2.370e-03
RLX	Estimate = 1.050e+00 | P = 0.000e+00 | std. err. = 3.750e-03	Estimate = 1.170e+00 | P = 0.000e+00 | std. err. = 4.140e-03	Estimate = 1.350e+00 | P = 0.000e+00 | std. err. = 4.680e-03
RIT	Estimate = 2.990e-01 | P = 9.250e-04 | std. err. = 8.970e-02	Estimate = 3.140e-01 | P = 3.170e-04 | std. err. = 8.670e-02	Estimate = 6.040e-01 | P = 1.530e-14 | std. err. = 7.670e-02
RIL	Estimate = 2.550e+00 | P = 5.970e-75 | std. err. = 1.120e-01	Estimate = 2.080e+00 | P = 6.640e-63 | std. err. = 1.050e-01	Estimate = 1.470e+00 | P = 1.010e-54 | std. err. = 8.570e-02
