# Supplementary material for: miRNA-like secondary structures in maize (Zea mays) genes and transposable elements correlate with small RNAs, methylation, and expression
Source: Genome Res. 2023 Nov;33(11):1932–46. doi: 10.1101/gr.277459.122 (PMC10760457; doi:10.1101/gr.277459.122)
Supplement: Supplement 8 [file Supplemental_Table_S5.xlsx]

## Sheet: Sheet1
Table S5. Overlap with siRNA and vs other small RNA loci from Lunardon et al., 2020.
Small RNA type1	Type	Real overlap­2	Expected overlap3	Fold-enrichment4	P-value5	Corrected P-value	Significant enrichment
21-24 nt	helitrons	0.0604	0.0367	1.64	0	0	TRUE
21-24 nt	TIRs	0.3101	0.2887	1.07	0	0	TRUE
21-24 nt	LTRs	0.0101	0.0081	1.25	0	0	TRUE
21-24 nt	LINE	0.0893	0.1165	0.77	0.71	1	FALSE
21-24 nt	SINE	0.0645	0.0645	1	1	1	FALSE
21-24 nt	gene	0.1861	0.069	2.7	0	0	TRUE
21-24 nt	mRNA	0.1861	0.0763	2.44	0	0	TRUE
Other sizes	helitrons	0.002	0.0025	0.8	0.94	1	FALSE
Other sizes	TIR element	0.0096	0.0085	1.14	0.03	0.28	FALSE
Other sizes	LTR	0.0005	0.0006	0.9	0.94	1	FALSE
Other sizes	LINE	0	0	NA	NA	NA	NA
Other sizes	SINE	0	0	NA	NA	NA	NA
Other sizes	gene	0.0095	0.011	0.86	1	1	FALSE
Other sizes	mRNA	0.0246	0.021	1.17	0	0.02	TRUE
121-24-nt smRNA loci are putatively produce siRNAs through the DCL pathway. Other sizes (< 21-nt, 23-nt, and >24-nt) putatively represent products of degradation or production not dependent on the DCL pathway.
2Percentage of miRNA-like loci that overlapped genomic positions with smRNA-producing loci
3Expected overlap produced from the average overlap in 500 permutations of miRNA-like loci position within features.
4Real overlap divided by expected overlap
5Significance from permutation test
Annotated small RNA loci were downloaded from https://plantsmallrnagenes.science.psu.edu/ on August 30, 2023
