# Supplementary material for: miRNA-like secondary structures in maize (Zea mays) genes and transposable elements correlate with small RNAs, methylation, and expression
Source: Genome Res. 2023 Nov;33(11):1932–46. doi: 10.1101/gr.277459.122 (PMC10760457; doi:10.1101/gr.277459.122)
Supplement: Supplement 9 [file Supplemental_Table_S6.xlsx]

## Sheet: Sheet1
Table S6. Illumina adapter sequences used to trim each small RNA library with CutAdapt (see Methods)
Library	Adapter
GSM306487	CTGTAGG
GSM306488	CTGTAGG
SRR032087	CTGTAGG
SRR032088	CTGTAGG
SRR032089	CTGTAGG
SRR032090	CTGTAGG
SRR032091	CTGTAGG
SRR1186264	ATCTCGT
SRR1917157	AGATCGG
SRR1917158	AGATCGG
SRR2086100	TGGAATT
SRR2086104	TGGAATT
SRR2086116	TGGAATT
SRR2086120	TGGAATT
SRR2086132	TGGAATT
SRR2086136	TGGAATT
SRR2106180	TGCAGCA
SRR2106184	TGCAGCA
SRR2106196	TGCAGCA
SRR2106200	TGCAGCA
SRR3684242	TCGTATG
SRR3684389	TCGTATG
SRR895785	TCGTATG
SRX483603	ATCTCGT
